# Supplementary material for: Oncofetal gene SALL4 and prognosis in cancer: A systematic review with meta-analysis
Source: PubMed Central journal article supplement (PMC5410278; doi:10.18632/oncotarget.14952), 2017-02-01
Supplement: oncotarget-08-22968-s001.pdf [file oncotarget-08-22968-s001.pdf]

# Oncofetal gene SALL4 and prognosis in cancer: A systematic review with meta-analysis

## SUPPLEMENTARY FIGURE AND TABLES

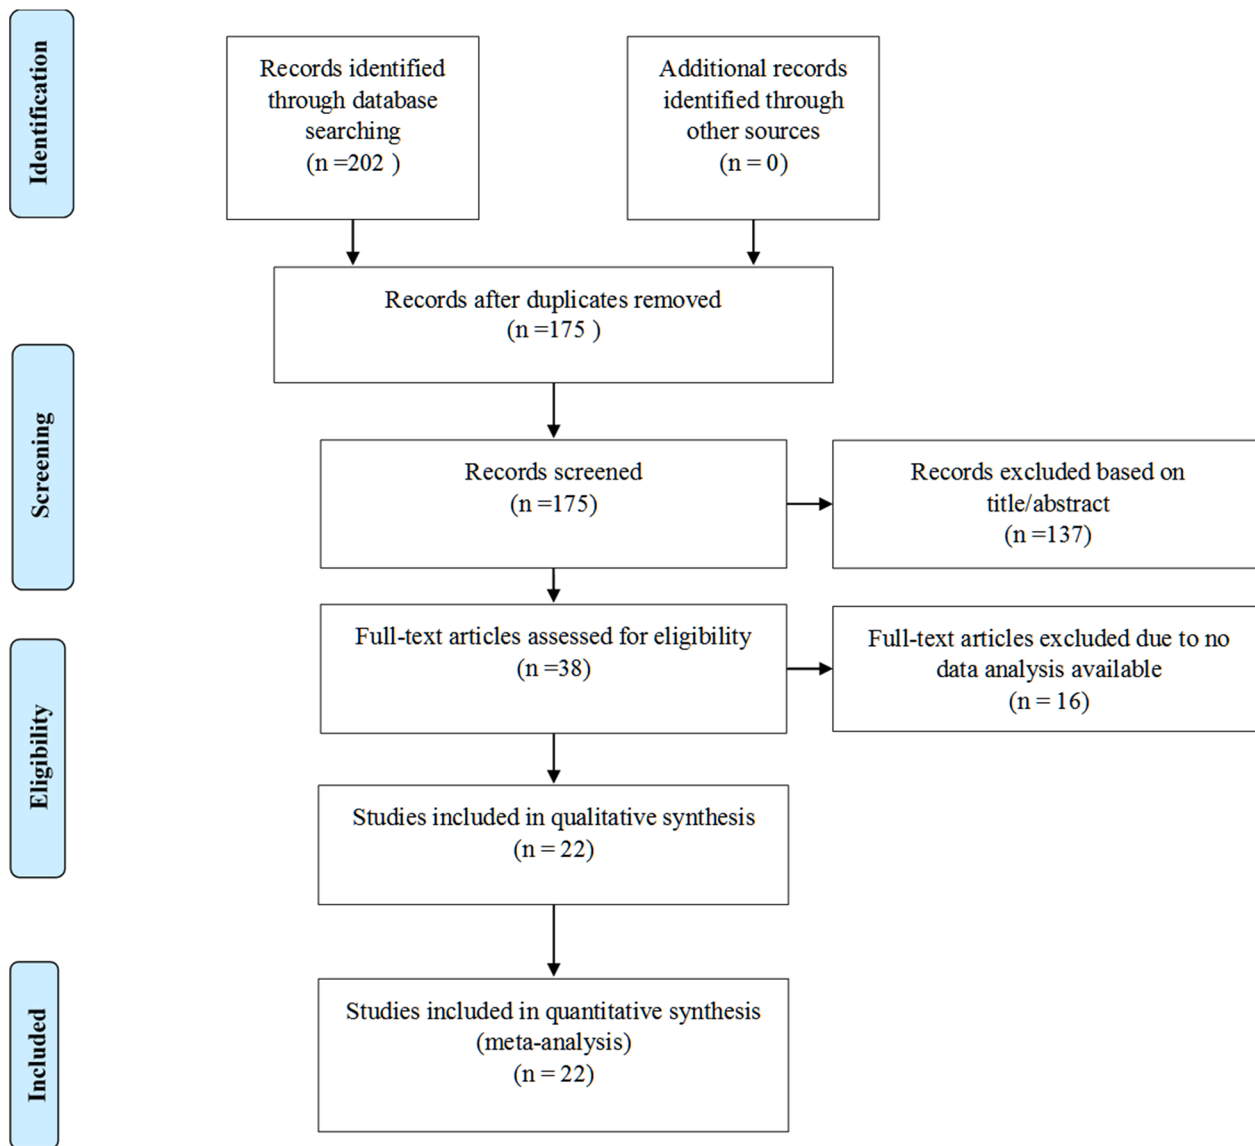

Supplementary Figure 1: PRISMA Flow chart.

**Supplementary Table 1: Quality of the studies assessed with the Newcastle Ottawa Scale.**

See Supplementary File 1

**Supplementary Table 2a: Descriptive characteristics of the studies included.**

See Supplementary File 1

**Supplementary Table 2b: Data synthesis from TCGA datasets.**

See Supplementary File 1

**Supplementary Table 3: Type and number of adjustments in each study.**

See Supplementary File 1
